# Supplementary material for: How does washing without water perform compared to the traditional bed bath: a systematic review
Source: Springer Nature journal article supplement (doi:10.1186/s12877-017-0425-4), 2017-01-25
Supplement: MOESM1 [file 12019106]

1 **Additional file 1: Search strategies used in PUBMED, MEDLINE, CINAHL and Embase**

2

3

4 Search strategy PUBMED

5

6 *Search run 1 as performed at the 25<sup>th</sup> of February, 2016*

7 (Prepack\* OR pack\* OR disposable\* OR "no rinse" OR "non rinse" OR impregnated OR wet OR

8 "single use" OR care OR "Without water" OR waterless OR basin OR basins OR washbasin\* OR

9 washbowl OR alternative OR alternatives OR towel OR bag OR "one step" OR dry)

10 (in title/abstract)

11 AND

12 (wipe OR wipes OR cloth OR cloths OR washcloth\* OR glove OR gloves OR mitt OR mitts OR

13 cleanser\* OR wash OR washing OR bath OR bathing OR "bed bath" OR "bed wash" OR "body wash")

14 (in title/abstract)

15 OR

16 (Bath MeSH term)

17 (in all fields)

18

19 Filters used:

20 - Articles published between 1995 – current

21 - "Clinical trial" or "controlled trial" or "randomized controlled trial"

22

23 *Search run 2 as performed at the 25<sup>th</sup> of February, 2016*

24 (Prepack\* OR pack\* OR disposable\* OR "no rinse" OR "non rinse" OR impregnated OR wet OR

25 "single use" OR care OR "Without water" OR waterless OR basin OR basins OR washbasin\* OR

26 washbowl OR alternative OR alternatives OR towel OR bag OR "one step" OR dry)

27 (in title/abstract)

28 AND

29 (wipe OR wipes OR cloth OR cloths OR washcloth\* OR glove OR gloves OR mitt OR mitts OR

30 cleanser\* OR wash OR washing OR bath OR bathing OR "bed bath" OR "bed wash" OR "body wash")

- 1 (in title/abstract)
- 2 OR
- 3 (Bath MeSH term)
- 4 (in all fields)
- 5 AND
- 6 (trial)
- 7 (in all fields)
- 8
- 9 Filters used:
- 10 - Articles published between 1995 – current
- 11

1 Search strategy MEDLINE

2

3 *Search run 1 as performed at the 25<sup>th</sup> of February, 2016*

4 (Prepack\$4.ab,ti. OR pack\$4.ab,ti. OR disposable\*.ab,ti. OR "no rinse".ab,ti. OR "non rinse".ab,ti. OR  
5 impregnated.ab,ti. OR wet.ab,ti. OR "single use".ab,ti. OR care.ab,ti. OR "Without water".ab,ti. OR  
6 waterless.ab,ti. OR basin.ab,ti. OR basins.ab,ti. OR washbasin\$1.ab,ti. OR washbowl.ab,ti. OR  
7 alternative.ab,ti. OR alternatives.ab,ti. OR towel.ab,ti. OR bag.ab,ti. OR "one step".ab,ti. OR dry.ab,ti.)

8 AND

9 (wipe.ab,ti. OR wipes.ab,ti. OR cloth.ab,ti. OR cloths.ab,ti. OR washcloth\*.ab,ti. OR glove.ab,ti. OR  
10 gloves.ab,ti. OR mitt.ab,ti. OR mitts.ab,ti. OR cleanser\*.ab,ti. OR wash.ab,ti. OR washing.ab,ti. OR  
11 bath.ab,ti. OR bathing.ab,ti. OR "bed bath".ab,ti. OR "bed wash".ab,ti. OR "body wash".ab,ti.)

12 OR

13 (Sub Heading Bath)

14 (in all fields; "Instrumentation", "Nursing", "Methods" and "Standards" were selected)

15

16 Filters used:

- 17 - Articles published between 1995 – current  
18 - "Clinical trial" or "controlled trial" or "randomized controlled trial"

19

20 *Search run 2 as performed at the 25<sup>th</sup> of February, 2016*

21 (Prepack\$4.ab,ti. OR pack\$4.ab,ti. OR disposable\*.ab,ti. OR "no rinse".ab,ti. OR "non rinse".ab,ti. OR  
22 impregnated.ab,ti. OR wet.ab,ti. OR "single use".ab,ti. OR care.ab,ti. OR "Without water".ab,ti. OR  
23 waterless.ab,ti. OR basin.ab,ti. OR basins.ab,ti. OR washbasin\$1.ab,ti. OR washbowl.ab,ti. OR  
24 alternative.ab,ti. OR alternatives.ab,ti. OR towel.ab,ti. OR bag.ab,ti. OR "one step".ab,ti. OR dry.ab,ti.)

25 AND

26 (wipe.ab,ti. OR wipes.ab,ti. OR cloth.ab,ti. OR cloths.ab,ti. OR washcloth\*.ab,ti. OR glove.ab,ti. OR  
27 gloves.ab,ti. OR mitt.ab,ti. OR mitts.ab,ti. OR cleanser\*.ab,ti. OR wash.ab,ti. OR washing.ab,ti. OR  
28 bath.ab,ti. OR bathing.ab,ti. OR "bed bath".ab,ti. OR "bed wash".ab,ti. OR "body wash".ab,ti.)

29 OR

30 (Sub Heading Bath)

1 (in all fields; “Instrumentation”, “Nursing”, “Methods” and “Standards” were selected)

2 AND

3 (trial.af.)

4

5 Filters used:

6 - Articles published between 1995 – current

7

1 Search strategy CINAHL

2

3 *Search run 1 as performed at the 25<sup>th</sup> of February, 2016*

4 (Prepack\* OR pack\* OR disposable\* OR "no rinse" OR "non rinse" OR impregnated OR wet OR

5 "single use" OR care OR "Without water" OR waterless OR basin OR basins OR washbasin\* OR

6 washbowl OR alternative OR alternatives OR towel OR bag OR "one step" OR dry)

7 (in abstract)

8 AND

9 (wipe OR wipes OR cloth OR cloths OR washcloth\* OR glove OR gloves OR mitt OR mitts OR

10 cleanser\* OR wash OR washing OR bath OR bathing OR "bed bath" OR "bed wash" OR "body wash")

11 (in abstract)

12 OR

13 (Bath MeSH term)

14 (in all fields; "Bathing" and "Baths" were selected)

15

16 Filters used:

17 - Articles published between 1995 – current

18 - "Clinical trial" or "randomized controlled trial"

19 - Apply related words

20

21 *Search run 2 as performed at the 25<sup>th</sup> of February, 2016*

22 (Prepack\* OR pack\* OR disposable\* OR "no rinse" OR "non rinse" OR impregnated OR wet OR

23 "single use" OR care OR "Without water" OR waterless OR basin OR basins OR washbasin\* OR

24 washbowl OR alternative OR alternatives OR towel OR bag OR "one step" OR dry)

25 (in abstract)

26 AND

27 (wipe OR wipes OR cloth OR cloths OR washcloth\* OR glove OR gloves OR mitt OR mitts OR

28 cleanser\* OR wash OR washing OR bath OR bathing OR "bed bath" OR "bed wash" OR "body wash")

29 (in abstract)

30 OR

- 1 (Sub Heading Bath)
- 2 (all fields; "Instrumentation", "Nursing", "Methods" and "Standards" were selected)
- 3 AND
- 4 (trial)
- 5 (in all fields)
- 6
- 7 Filters used:
- 8 - Articles published between 1995 – current
- 9 - Apply related words
- 10

1 Search strategy Embase

2

3 *Search run 1 as performed at the 25<sup>th</sup> of February, 2016*

4 (Prepack\$4.ab,ti. OR pack\$4.ab,ti. OR disposable\*.ab,ti. OR "no rinse".ab,ti. OR "non rinse".ab,ti. OR  
5 impregnated.ab,ti. OR wet.ab,ti. OR "single use".ab,ti. OR care.ab,ti. OR "Without water".ab,ti. OR  
6 waterless.ab,ti. OR basin.ab,ti. OR basins.ab,ti. OR basinless.ab,ti. OR washbasin\$1.ab,ti. OR  
7 washbowl.ab,ti. OR alternative.ab,ti. OR alternatives.ab,ti. OR towel.ab,ti. OR bag.ab,ti. OR "one  
8 step".ab,ti. OR dry.ab,ti.)

9 AND

10 (wipe.ab,ti. OR wipes.ab,ti. OR cloth.ab,ti. OR cloths.ab,ti. OR washcloth\*.ab,ti. OR glove.ab,ti. OR  
11 gloves.ab,ti. OR mitt.ab,ti. OR mitts.ab,ti. OR cleanser\*.ab,ti. OR wash.ab,ti. OR washing.ab,ti. OR  
12 bath.ab,ti. OR bathing.ab,ti. OR "bed bath".ab,ti. OR "bed wash".ab,ti. OR "body wash".ab,ti.)

13

14 Filters used:

15 - Articles published between 1995 – current

16 - All clinical trials

17

18 *Search run 2 as performed at the 25<sup>th</sup> of February, 2016*

19 (Prepack\$4.ab,ti. OR pack\$4.ab,ti. OR disposable\*.ab,ti. OR "no rinse".ab,ti. OR "non rinse".ab,ti. OR  
20 impregnated.ab,ti. OR wet.ab,ti. OR "single use".ab,ti. OR care.ab,ti. OR "Without water".ab,ti. OR  
21 waterless.ab,ti. OR basin.ab,ti. OR basins.ab,ti. OR basinless.ab,ti. OR washbasin\$1.ab,ti. OR  
22 washbowl.ab,ti. OR alternative.ab,ti. OR alternatives.ab,ti. OR towel.ab,ti. OR bag.ab,ti. OR "one  
23 step".ab,ti. OR dry.ab,ti.)

24 AND

25 (wipe.ab,ti. OR wipes.ab,ti. OR cloth.ab,ti. OR cloths.ab,ti. OR washcloth\*.ab,ti. OR glove.ab,ti. OR  
26 gloves.ab,ti. OR mitt.ab,ti. OR mitts.ab,ti. OR cleanser\*.ab,ti. OR wash.ab,ti. OR washing.ab,ti. OR  
27 bath.ab,ti. OR bathing.ab,ti. OR "bed bath".ab,ti. OR "bed wash".ab,ti. OR "body wash".ab,ti.)

28 AND

29 (trial.af.)

30

1 Filters used:

2 - Articles published between 1995 – current

3

4
